# Supplementary material for: CNS inflammatory demyelinating events after COVID-19 vaccines: A case series and systematic review
Source: PubMed Central journal article supplement (PMC9752005; doi:10.3389/fneur.2022.1018785), 2022-12-01
Supplement: Image_1.pdf [file Image_1.pdf]

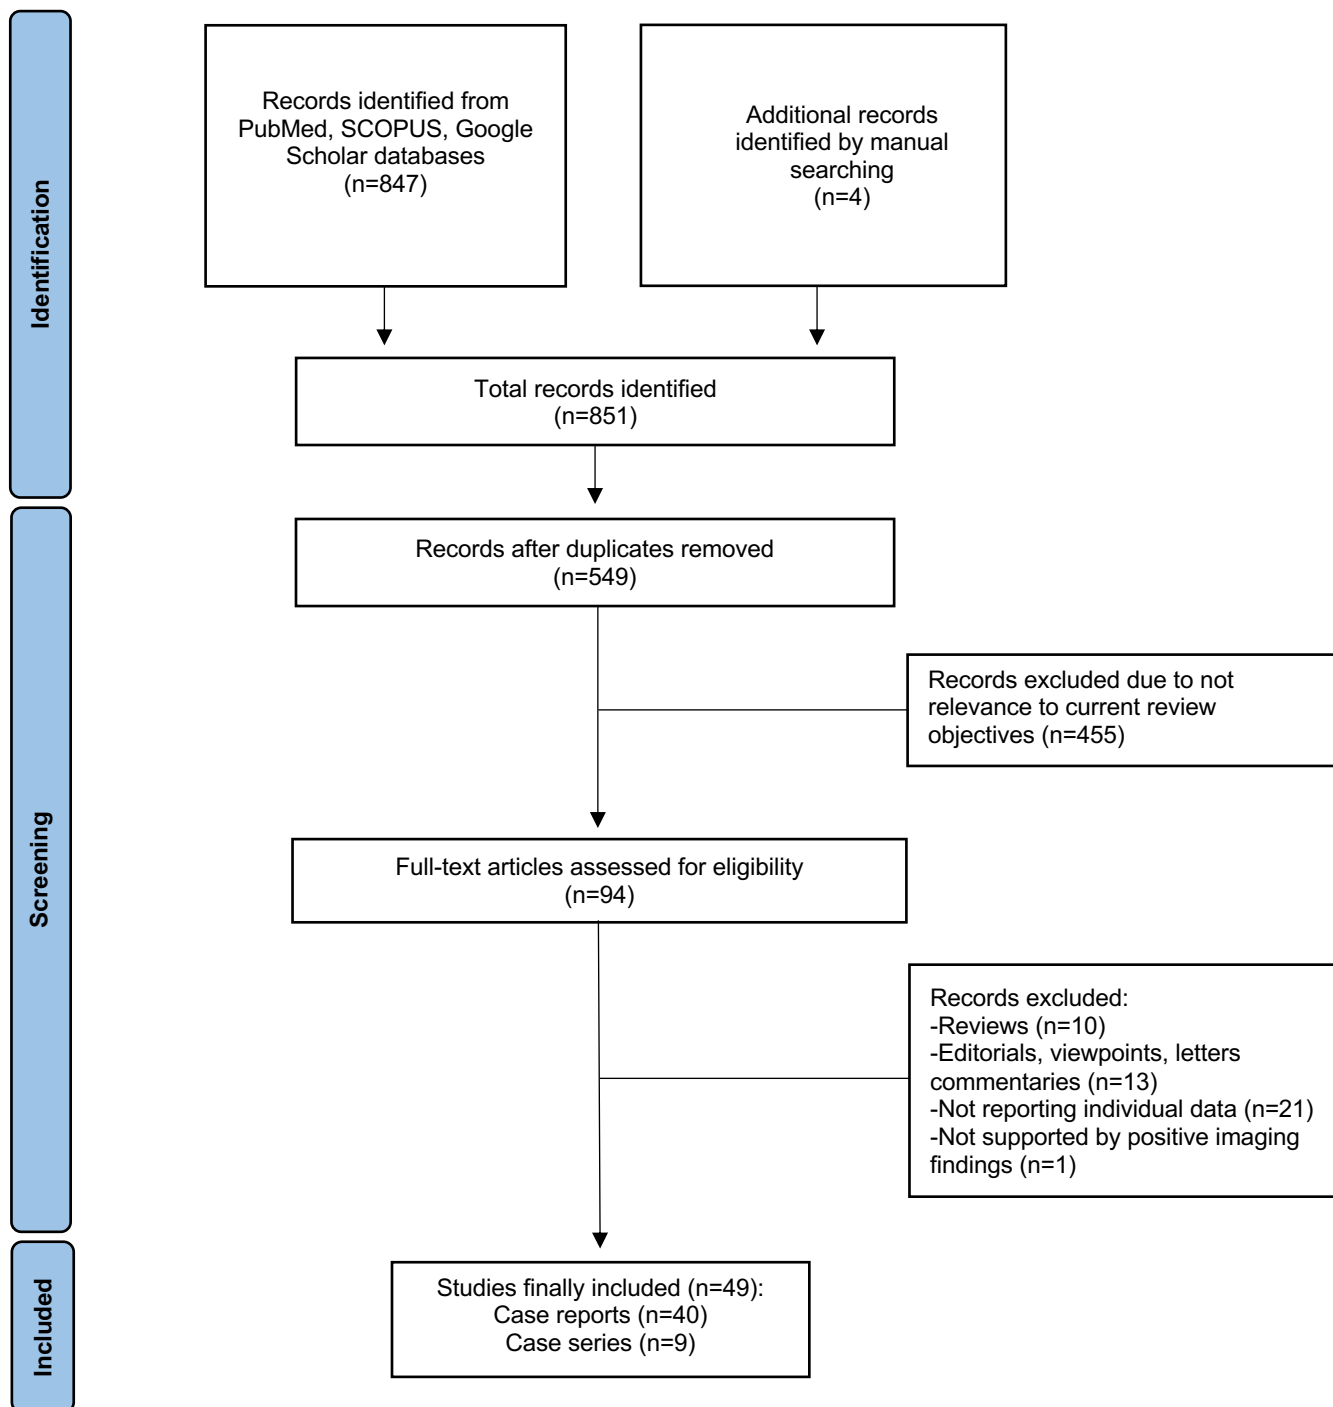

**Supplementary figure 1.** Preferred reporting items for systematic reviews and meta-analyses (PRISMA) study selection flow diagram
